# Supplementary material
Source: publisher figshare collection journal article supplement (https://acs.figshare.com/ndownloader/files/4467274)
Supplement: Supplementary file 1 [file 4467274]

#\#CIF_1.1
 
#  CIF produced by WinGX routine CIF_UPDATE
#  Created on 2010-01-15 at 13:59:18
#  Using CIFtbx version 2.6.2 16 Jun 1998
 
#  Dictionary name : cif_core.dic
#  Dictionary vers : 2.3
#  Request file    : c:\program files\wingx\files\archive.dat
#  CIF files read  : mk109 import struct
 
 
data_mk109
 
_audit_creation_date                    2010-01-15T13:59:18-00:00
_audit_creation_method                  'WinGX routine CIF_UPDATE'
_audit_conform_dict_name                cif_core.dic
_audit_conform_dict_version             2.3
_audit_conform_dict_location            ftp://ftp.iucr.org/pub/cif_core.dic
_publ_requested_category                FM
 
#----------------------------------------------------------------------------#
#                   CHEMICAL INFORMATION                                     #
#----------------------------------------------------------------------------#
 
_chemical_name_systematic
;
 ?
;
_chemical_name_common                   mk109
_chemical_formula_moiety                'C48 H70 Ce2 N28 O12 W2'
_chemical_formula_sum                   'C48 H62 Ce2 N28 O12 W2'
_chemical_formula_weight                1870.64
_chemical_compound_source               'synthesis as described'
 
#----------------------------------------------------------------------------#
#                   UNIT CELL INFORMATION                                    #
#----------------------------------------------------------------------------#
 
_symmetry_cell_setting                  monoclinic
_symmetry_space_group_name_H-M          P21/c
_symmetry_space_group_name_Hall         '-P 2yn'
_symmetry_Int_Tables_number             14
loop_
    _symmetry_equiv_pos_as_xyz
'x, y, z'
'-x, y+1/2, -z+1/2'
'-x, -y, -z'
'x, -y-1/2, z-1/2'
 
_cell_length_a                          10.673(5)
_cell_length_b                          19.808(5)
_cell_length_c                          19.284(5)
_cell_angle_alpha                       90
_cell_angle_beta                        117.424(16)
_cell_angle_gamma                       90
_cell_volume                            3619(2)
_cell_formula_units_Z                   2
_cell_measurement_temperature           293(2)
_cell_measurement_reflns_used           27228
_cell_measurement_theta_min             0.998
_cell_measurement_theta_max             34.972
_cell_measurement_wavelength            0.71073
 
#----------------------------------------------------------------------------#
#                   CRYSTAL INFORMATION                                      #
#----------------------------------------------------------------------------#
 
_exptl_crystal_description              prism
_exptl_crystal_colour                   red
_exptl_crystal_size_max                 0.28
_exptl_crystal_size_mid                 0.25
_exptl_crystal_size_min                 0.18
_exptl_crystal_density_diffrn           1.717
_exptl_crystal_density_method           'not measured'
_exptl_crystal_F_000                    1811
 
#----------------------------------------------------------------------------#
#                   ABSORPTION CORRECTION                                    #
#----------------------------------------------------------------------------#
 
_exptl_absorpt_coefficient_mu           4.473
_exptl_absorpt_correction_type          Multi-scan
_exptl_absorpt_process_details          '(DENZO-SMN; Otwinowski & Minor, 1997)'
_exptl_absorpt_correction_T_min         0.3673
_exptl_absorpt_correction_T_max         0.4998
 
#----------------------------------------------------------------------------#
#                   DATA COLLECTION                                          #
#----------------------------------------------------------------------------#
 
_diffrn_ambient_temperature             293(2)
_diffrn_radiation_wavelength            0.71069
_diffrn_radiation_type                  MoK\a
_diffrn_radiation_monochromator         graphite
_diffrn_radiation_probe                 x-ray
_diffrn_detector_area_resol_mean        9
_diffrn_orient_matrix_type              'by Nonius Collect from scalepack cell'
_diffrn_orient_matrix_ub_11             0.0258268
_diffrn_orient_matrix_ub_12             -0.0900623
_diffrn_orient_matrix_ub_13             0.0098008
_diffrn_orient_matrix_ub_21             -0.0049231
_diffrn_orient_matrix_ub_22             0.0040381
_diffrn_orient_matrix_ub_23             0.0500805
_diffrn_orient_matrix_ub_31             -0.0539231
_diffrn_orient_matrix_ub_32             -0.0222062
_diffrn_orient_matrix_ub_33             -0.0035103
_diffrn_measurement_device              '95mm CCD camera on \k-goniostat'
_diffrn_measurement_device_type         KappaCCD
_diffrn_measurement_method              CCD
_diffrn_reflns_av_R_equivalents         0.0472
_diffrn_reflns_av_unetI/netI            0.0521
_diffrn_reflns_number                   46658
_diffrn_reflns_limit_h_min              -16
_diffrn_reflns_limit_h_max              17
_diffrn_reflns_limit_k_min              -20
_diffrn_reflns_limit_k_max              31
_diffrn_reflns_limit_l_min              -31
_diffrn_reflns_limit_l_max              31
_diffrn_reflns_theta_min                2.18
_diffrn_reflns_theta_max                34.98
_diffrn_reflns_theta_full               34.98
_diffrn_measured_fraction_theta_full
                                        0.995
_diffrn_measured_fraction_theta_max
                                        0.995
_reflns_number_total                    15841
_reflns_number_gt                       12421
_reflns_threshold_expression            >2sigma(I)
 
#----------------------------------------------------------------------------#
#                   COMPUTER PROGRAMS USED                                   #
#----------------------------------------------------------------------------#
 
_computing_data_collection              'Collect (Nonius BV, 1997-2000)'
_computing_cell_refinement
                                       'HKL Scalepack (Otwinowski & Minor 1997)'
_computing_data_reduction
                             'HKL Denzo and Scalepack (Otwinowski & Minor 1997)'
_computing_structure_solution           'SHELXS-86 (Sheldrick, 1986)'
_computing_structure_refinement         'SHELXL-97 (Sheldrick, 1997)'
_computing_molecular_graphics           'Ortep-3 for Windows (Farrugia, 1997)'
_computing_publication_material
                                   'WinGX publication routines (Farrugia, 1999)'
 
#----------------------------------------------------------------------------#
#                   REFINEMENT INFORMATION                                   #
#----------------------------------------------------------------------------#
 
_refine_special_details
;
 Refinement of F^2^ against ALL reflections.  The weighted R-factor wR and
 goodness of fit S are based on F^2^, conventional R-factors R are based
 on F, with F set to zero for negative F^2^. The threshold expression of
 F^2^ > 2sigma(F^2^) is used only for calculating R-factors(gt) etc. and is
 not relevant to the choice of reflections for refinement.  R-factors based
 on F^2^ are statistically about twice as large as those based on F, and R-
 factors based on ALL data will be even larger.
;
_refine_ls_structure_factor_coef        Fsqd
_refine_ls_matrix_type                  full
_refine_ls_weighting_scheme             calc
_refine_ls_weighting_details
         'calc w=1/[\s^2^(Fo^2^)+(0.0287P)^2^+4.4013P] where P=(Fo^2^+2Fc^2^)/3'
_atom_sites_solution_primary            direct
_atom_sites_solution_secondary          difmap
_atom_sites_solution_hydrogens          geom
_refine_ls_hydrogen_treatment           mixed
_refine_ls_extinction_method            SHELXL
_refine_ls_extinction_expression
                                    Fc^*^=kFc[1+0.001xFc^2^\l^3^/sin(2\q)]^-1/4^
_refine_ls_extinction_coef              0.00046(6)
_refine_ls_number_reflns                15841
_refine_ls_number_parameters            424
_refine_ls_number_restraints            0
_refine_ls_R_factor_all                 0.0543
_refine_ls_R_factor_gt                  0.0354
_refine_ls_wR_factor_ref                0.0826
_refine_ls_wR_factor_gt                 0.0753
_refine_ls_goodness_of_fit_ref          1.081
_refine_ls_restrained_S_all             1.081
_refine_ls_shift/su_max                 0.004
_refine_ls_shift/su_mean                0
_refine_diff_density_max                1.869
_refine_diff_density_min                -1.436
_refine_diff_density_rms                0.154
 
#----------------------------------------------------------------------------#
#                   ATOMIC TYPES, COORDINATES AND THERMAL PARAMETERS         #
#----------------------------------------------------------------------------#
 
loop_
    _atom_type_symbol
    _atom_type_description
    _atom_type_scat_dispersion_real
    _atom_type_scat_dispersion_imag
    _atom_type_scat_source
C C 0.003 0.002 'International Tables Vol C Tables 4.2.6.8 and 6.1.1.4'
H H 0 0 'International Tables Vol C Tables 4.2.6.8 and 6.1.1.4'
Ce Ce -0.249 2.633 'International Tables Vol C Tables 4.2.6.8 and 6.1.1.4'
N N 0.006 0.003 'International Tables Vol C Tables 4.2.6.8 and 6.1.1.4'
O O 0.011 0.006 'International Tables Vol C Tables 4.2.6.8 and 6.1.1.4'
W W -0.849 6.872 'International Tables Vol C Tables 4.2.6.8 and 6.1.1.4'
 
loop_
    _atom_site_label
    _atom_site_type_symbol
    _atom_site_fract_x
    _atom_site_fract_y
    _atom_site_fract_z
    _atom_site_U_iso_or_equiv
    _atom_site_adp_type
    _atom_site_occupancy
    _atom_site_symmetry_multiplicity
    _atom_site_calc_flag
    _atom_site_refinement_flags
    _atom_site_disorder_assembly
    _atom_site_disorder_group
W1 W 0.205806(11) -0.174208(6) 0.245429(6) 0.02720(3) Uani 1 1 d . . .
Ce2 Ce 0.212150(16) 0.102920(8) 0.362648(9) 0.02788(4) Uani 1 1 d . . .
N1 N 0.2111(4) -0.01701(14) 0.30534(18) 0.0447(7) Uani 1 1 d . . .
C1 C 0.2070(4) -0.07103(16) 0.28413(18) 0.0360(6) Uani 1 1 d . . .
C2 C 0.1055(5) -0.17331(18) 0.3203(2) 0.0477(8) Uani 1 1 d . . .
N2 N 0.0502(6) -0.1740(2) 0.3591(3) 0.0762(13) Uani 1 1 d . . .
C3 C 0.0457(4) -0.25180(16) 0.19664(19) 0.0385(6) Uani 1 1 d . . .
N3 N -0.0374(3) -0.29398(15) 0.17128(19) 0.0483(7) Uani 1 1 d . . .
C4 C 0.0185(4) -0.1322(2) 0.1523(2) 0.0550(10) Uani 1 1 d . . .
N4 N -0.0811(5) -0.1109(2) 0.1027(3) 0.0973(18) Uani 1 1 d . . .
C5 C 0.4198(4) -0.1552(2) 0.3329(2) 0.0520(9) Uani 1 1 d . . .
N5 N 0.5321(4) -0.1439(2) 0.3797(3) 0.0844(15) Uani 1 1 d . . .
C6 C 0.2873(4) -0.2642(2) 0.3157(2) 0.0492(8) Uani 1 1 d . . .
N6 N 0.3313(5) -0.3123(2) 0.3519(3) 0.0763(12) Uani 1 1 d . . .
C7 C 0.2695(4) -0.23582(19) 0.1755(2) 0.0491(8) Uani 1 1 d . . .
N7 N 0.2968(6) -0.2698(2) 0.1363(3) 0.0868(15) Uani 1 1 d . . .
C8 C 0.2880(5) -0.1095(2) 0.1853(2) 0.0524(9) Uani 1 1 d . . .
N8 N 0.3326(6) -0.0749(2) 0.1543(3) 0.0827(15) Uani 1 1 d . . .
O11 O 0.3516(4) 0.20491(16) 0.4063(2) 0.0750(10) Uani 1 1 d . . .
C12 C 0.4016(6) 0.2594(2) 0.4400(3) 0.0670(12) Uani 1 1 d . . .
H12 H 0.4442 0.2593 0.4943 0.08 Uiso 1 1 calc R . .
N13 N 0.3992(5) 0.31512(19) 0.4065(3) 0.0633(10) Uani 1 1 d . . .
C14 C 0.3302(11) 0.3187(4) 0.3223(5) 0.137(3) Uani 1 1 d . . .
H14A H 0.2657 0.2816 0.3013 0.205 Uiso 1 1 calc R . .
H14B H 0.3997 0.3164 0.3039 0.205 Uiso 1 1 calc R . .
H14C H 0.2793 0.3604 0.3058 0.205 Uiso 1 1 calc R . .
C15 C 0.4536(9) 0.3785(3) 0.4469(4) 0.105(2) Uani 1 1 d . . .
H15A H 0.498 0.3709 0.5023 0.157 Uiso 1 1 calc R . .
H15B H 0.3773 0.41 0.4329 0.157 Uiso 1 1 calc R . .
H15C H 0.5215 0.3965 0.4322 0.157 Uiso 1 1 calc R . .
O21 O 0.3201(3) 0.12085(18) 0.27533(17) 0.0601(8) Uani 1 1 d . . .
C22 C 0.3051(4) 0.0969(2) 0.2135(2) 0.0524(9) Uani 1 1 d . . .
H22 H 0.2873 0.0508 0.2058 0.063 Uiso 1 1 calc R . .
N23 N 0.3121(4) 0.1309(2) 0.1578(2) 0.0633(10) Uani 1 1 d . . .
C24 C 0.2994(10) 0.0975(5) 0.0881(3) 0.125(3) Uani 1 1 d . . .
H24A H 0.2763 0.0508 0.0893 0.188 Uiso 1 1 calc R . .
H24B H 0.3872 0.1008 0.0859 0.188 Uiso 1 1 calc R . .
H24C H 0.2261 0.1187 0.0428 0.188 Uiso 1 1 calc R . .
C25 C 0.3365(9) 0.2022(3) 0.1652(5) 0.108(2) Uani 1 1 d . . .
H25A H 0.3792 0.2145 0.2194 0.162 Uiso 1 1 calc R . .
H25B H 0.2483 0.2255 0.1376 0.162 Uiso 1 1 calc R . .
H25C H 0.3984 0.2143 0.1436 0.162 Uiso 1 1 calc R . .
O31 O 0.0282(3) 0.10073(16) 0.22341(15) 0.0582(8) Uani 1 1 d . . .
C32 C -0.0172(5) 0.1390(3) 0.1659(2) 0.0637(12) Uani 1 1 d . . .
H32 H -0.0061 0.1852 0.1754 0.076 Uiso 1 1 calc R . .
N33 N -0.0789(5) 0.1193(3) 0.0936(2) 0.0858(15) Uani 1 1 d . . .
C34 C -0.1015(13) 0.0517(5) 0.0725(6) 0.187(6) Uani 1 1 d . . .
H34A H -0.1933 0.0385 0.0652 0.28 Uiso 1 1 calc R . .
H34B H -0.031 0.0247 0.1131 0.28 Uiso 1 1 calc R . .
H34C H -0.0957 0.0451 0.0247 0.28 Uiso 1 1 calc R . .
C35 C -0.1338(10) 0.1692(4) 0.0301(4) 0.126(3) Uani 1 1 d . . .
H35A H -0.0871 0.2117 0.0491 0.19 Uiso 1 1 calc R . .
H35B H -0.2334 0.1747 0.0117 0.19 Uiso 1 1 calc R . .
H35C H -0.1166 0.1539 -0.012 0.19 Uiso 1 1 calc R . .
O41 O -0.0019(3) 0.05282(14) 0.35913(15) 0.0483(6) Uani 1 1 d . . .
C42 C -0.1290(4) 0.0621(2) 0.3148(3) 0.0563(10) Uani 1 1 d . . .
H42 H -0.155 0.1032 0.2886 0.068 Uiso 1 1 calc R . .
N43 N -0.2285(4) 0.0188(2) 0.3022(3) 0.0653(10) Uani 1 1 d . . .
C44 C -0.1948(8) -0.0454(3) 0.3419(5) 0.119(3) Uani 1 1 d . . .
H44A H -0.1521 -0.0382 0.3973 0.178 Uiso 1 1 calc R . .
H44B H -0.1302 -0.0694 0.3289 0.178 Uiso 1 1 calc R . .
H44C H -0.2796 -0.0714 0.3258 0.178 Uiso 1 1 calc R . .
C45 C -0.3766(6) 0.0353(4) 0.2504(5) 0.125(3) Uani 1 1 d . . .
H45A H -0.3887 0.0834 0.2479 0.188 Uiso 1 1 calc R . .
H45B H -0.4354 0.0152 0.2703 0.188 Uiso 1 1 calc R . .
H45C H -0.4027 0.018 0.199 0.188 Uiso 1 1 calc R . .
C51 C 0.5503(3) 0.01999(15) 0.49164(16) 0.0304(5) Uani 1 1 d . . .
N52 N 0.6845(3) 0.00064(14) 0.52758(16) 0.0372(6) Uani 1 1 d . . .
C53 C 0.7753(4) 0.0375(2) 0.5128(2) 0.0561(11) Uani 1 1 d . . .
H53 H 0.8704 0.0259 0.5366 0.067 Uiso 1 1 calc R . .
C54 C 0.7300(4) 0.0922(2) 0.4633(3) 0.0600(12) Uani 1 1 d . . .
H54 H 0.7933 0.118 0.4539 0.072 Uiso 1 1 calc R . .
C55 C 0.5894(4) 0.1074(2) 0.4283(2) 0.0492(9) Uani 1 1 d . . .
H55 H 0.5572 0.1441 0.3945 0.059 Uiso 1 1 calc R . .
N56 N 0.4967(3) 0.07093(14) 0.44146(16) 0.0382(6) Uani 1 1 d . . .
O6 O 0.2124(3) 0.13285(16) 0.48991(14) 0.0530(7) Uani 1 1 d . . .
O7 O 0.0290(11) 0.1910(4) 0.5087(4) 0.226(5) Uani 1 1 d . . .
 
loop_
    _atom_site_aniso_label
    _atom_site_aniso_U_11
    _atom_site_aniso_U_22
    _atom_site_aniso_U_33
    _atom_site_aniso_U_23
    _atom_site_aniso_U_13
    _atom_site_aniso_U_12
W1 0.02991(5) 0.02260(5) 0.02612(5) -0.00539(4) 0.01036(4) -0.00329(4)
Ce2 0.03011(7) 0.02257(7) 0.02709(7) 0.00194(5) 0.00987(6) 0.00431(5)
N1 0.0624(19) 0.0284(13) 0.0460(15) -0.0022(11) 0.0272(14) 0.0037(12)
C1 0.0431(16) 0.0287(14) 0.0370(14) -0.0018(11) 0.0192(13) 0.0009(12)
C2 0.064(2) 0.0342(17) 0.057(2) -0.0098(15) 0.0382(19) -0.0096(15)
N2 0.113(4) 0.058(2) 0.098(3) -0.013(2) 0.083(3) -0.010(2)
C3 0.0407(15) 0.0289(14) 0.0386(15) -0.0005(12) 0.0122(13) -0.0033(12)
N3 0.0498(17) 0.0338(15) 0.0480(16) -0.0018(12) 0.0112(13) -0.0138(12)
C4 0.051(2) 0.0403(19) 0.049(2) 0.0071(16) 0.0017(16) -0.0091(16)
N4 0.073(3) 0.067(3) 0.085(3) 0.021(2) -0.021(2) -0.003(2)
C5 0.0405(18) 0.0376(18) 0.058(2) -0.0088(16) 0.0063(16) -0.0020(14)
N5 0.049(2) 0.066(3) 0.090(3) -0.014(2) -0.009(2) -0.0054(19)
C6 0.0456(19) 0.0413(19) 0.0473(19) 0.0033(15) 0.0100(15) -0.0032(15)
N6 0.070(3) 0.058(2) 0.079(3) 0.028(2) 0.016(2) 0.007(2)
C7 0.059(2) 0.0386(18) 0.058(2) -0.0109(16) 0.0334(19) -0.0008(16)
N7 0.118(4) 0.064(3) 0.105(4) -0.033(2) 0.074(3) 0.001(3)
C8 0.072(3) 0.044(2) 0.057(2) -0.0158(17) 0.043(2) -0.0165(18)
N8 0.128(4) 0.065(3) 0.094(3) -0.020(2) 0.084(3) -0.034(3)
O11 0.066(2) 0.0431(16) 0.118(3) -0.0271(18) 0.044(2) -0.0188(14)
C12 0.078(3) 0.048(2) 0.088(3) -0.015(2) 0.049(3) -0.012(2)
N13 0.077(3) 0.0460(19) 0.078(3) -0.0106(18) 0.045(2) -0.0165(18)
C14 0.173(9) 0.134(7) 0.084(5) 0.007(5) 0.043(6) -0.041(6)
C15 0.148(6) 0.050(3) 0.139(6) -0.026(3) 0.086(5) -0.043(4)
O21 0.0653(18) 0.080(2) 0.0433(14) -0.0026(14) 0.0319(14) -0.0158(16)
C22 0.053(2) 0.062(2) 0.0456(19) 0.0051(17) 0.0258(17) 0.0010(18)
N23 0.067(2) 0.081(3) 0.0460(18) 0.0121(18) 0.0292(17) -0.002(2)
C24 0.167(8) 0.171(8) 0.055(3) -0.002(4) 0.066(4) -0.011(6)
C25 0.129(6) 0.088(5) 0.125(6) 0.023(4) 0.073(5) -0.013(4)
O31 0.0580(17) 0.0628(18) 0.0358(12) 0.0007(12) 0.0060(12) 0.0164(14)
C32 0.063(3) 0.073(3) 0.045(2) -0.002(2) 0.0163(19) 0.018(2)
N33 0.087(3) 0.115(4) 0.0334(17) -0.011(2) 0.0088(19) 0.016(3)
C34 0.257(14) 0.095(6) 0.117(7) -0.010(6) 0.008(8) 0.010(8)
C35 0.160(8) 0.136(7) 0.062(4) 0.015(4) 0.033(5) 0.024(6)
O41 0.0313(11) 0.0528(15) 0.0516(14) 0.0077(12) 0.0111(10) -0.0015(10)
C42 0.0386(18) 0.055(2) 0.066(2) 0.0094(19) 0.0158(17) 0.0013(16)
N43 0.0360(16) 0.061(2) 0.085(3) -0.001(2) 0.0161(17) -0.0068(15)
C44 0.093(5) 0.069(4) 0.174(8) 0.018(5) 0.045(5) -0.021(4)
C45 0.038(3) 0.139(7) 0.151(7) 0.002(5) 0.002(3) -0.008(3)
C51 0.0311(13) 0.0280(13) 0.0280(12) 0.0068(10) 0.0100(10) 0.0023(10)
N52 0.0315(12) 0.0392(14) 0.0384(13) 0.0124(11) 0.0140(10) 0.0033(10)
C53 0.0285(15) 0.069(3) 0.065(2) 0.035(2) 0.0162(15) 0.0034(15)
C54 0.0391(18) 0.066(3) 0.071(3) 0.037(2) 0.0219(18) -0.0019(17)
C55 0.0410(17) 0.049(2) 0.057(2) 0.0272(17) 0.0218(16) 0.0031(15)
N56 0.0356(13) 0.0341(13) 0.0405(13) 0.0174(11) 0.0138(11) 0.0022(10)
O6 0.0506(15) 0.0675(18) 0.0315(11) -0.0078(11) 0.0110(10) 0.0092(13)
O7 0.308(11) 0.202(8) 0.096(4) 0.018(5) 0.032(6) -0.109(8)
 
 
#----------------------------------------------------------------------------#
#                   MOLECULAR GEOMETRY                                       #
#----------------------------------------------------------------------------#
 
_geom_special_details
;
 All esds (except the esd in the dihedral angle between two l.s. planes)
 are estimated using the full covariance matrix.  The cell esds are taken
 into account individually in the estimation of esds in distances, angles
 and torsion angles; correlations between esds in cell parameters are only
 used when they are defined by crystal symmetry.  An approximate (isotropic)
 treatment of cell esds is used for estimating esds involving l.s. planes.
;
loop_
    _geom_bond_atom_site_label_1
    _geom_bond_atom_site_label_2
    _geom_bond_distance
    _geom_bond_site_symmetry_2
    _geom_bond_publ_flag
W1 C4 2.146(4) . ?
W1 C7 2.148(4) . ?
W1 C2 2.157(4) . ?
W1 C5 2.158(4) . ?
W1 C3 2.165(3) . ?
W1 C6 2.165(4) . ?
W1 C8 2.166(4) . ?
W1 C1 2.174(3) . ?
Ce2 O11 2.419(3) . ?
Ce2 O41 2.463(3) . ?
Ce2 O21 2.465(3) . ?
Ce2 O31 2.492(3) . ?
Ce2 O6 2.524(3) . ?
Ce2 N1 2.618(3) . ?
Ce2 N3 2.637(3) 2 ?
Ce2 N56 2.772(3) . ?
Ce2 N52 2.785(3) 3_656 ?
N1 C1 1.139(4) . ?
C2 N2 1.147(5) . ?
C3 N3 1.151(4) . ?
N3 Ce2 2.637(3) 2_545 ?
C4 N4 1.134(5) . ?
C5 N5 1.142(5) . ?
C6 N6 1.144(5) . ?
C7 N7 1.145(5) . ?
C8 N8 1.148(5) . ?
O11 C12 1.246(5) . ?
C12 N13 1.274(6) . ?
C12 H12 0.93 . ?
N13 C14 1.443(8) . ?
N13 C15 1.450(6) . ?
C14 H14A 0.96 . ?
C14 H14B 0.96 . ?
C14 H14C 0.96 . ?
C15 H15A 0.96 . ?
C15 H15B 0.96 . ?
C15 H15C 0.96 . ?
O21 C22 1.223(5) . ?
C22 N23 1.300(5) . ?
C22 H22 0.93 . ?
N23 C25 1.431(8) . ?
N23 C24 1.447(7) . ?
C24 H24A 0.96 . ?
C24 H24B 0.96 . ?
C24 H24C 0.96 . ?
C25 H25A 0.96 . ?
C25 H25B 0.96 . ?
C25 H25C 0.96 . ?
O31 C32 1.243(5) . ?
C32 N33 1.298(6) . ?
C32 H32 0.93 . ?
N33 C34 1.387(9) . ?
N33 C35 1.470(8) . ?
C34 H34A 0.96 . ?
C34 H34B 0.96 . ?
C34 H34C 0.96 . ?
C35 H35A 0.96 . ?
C35 H35B 0.96 . ?
C35 H35C 0.96 . ?
O41 C42 1.239(4) . ?
C42 N43 1.299(5) . ?
C42 H42 0.93 . ?
N43 C44 1.441(7) . ?
N43 C45 1.466(7) . ?
C44 H44A 0.96 . ?
C44 H44B 0.96 . ?
C44 H44C 0.96 . ?
C45 H45A 0.96 . ?
C45 H45B 0.96 . ?
C45 H45C 0.96 . ?
C51 N52 1.329(4) . ?
C51 N56 1.331(4) . ?
C51 C51 1.484(6) 3_656 ?
N52 C53 1.344(4) . ?
N52 Ce2 2.785(3) 3_656 ?
C53 C54 1.376(5) . ?
C53 H53 0.93 . ?
C54 C55 1.365(5) . ?
C54 H54 0.93 . ?
C55 N56 1.340(4) . ?
C55 H55 0.93 . ?
 
loop_
    _geom_angle_atom_site_label_1
    _geom_angle_atom_site_label_2
    _geom_angle_atom_site_label_3
    _geom_angle
    _geom_angle_site_symmetry_1
    _geom_angle_site_symmetry_3
    _geom_angle_publ_flag
C4 W1 C7 97.84(18) . . ?
C4 W1 C2 89.95(18) . . ?
C7 W1 C2 145.36(14) . . ?
C4 W1 C5 146.01(15) . . ?
C7 W1 C5 93.62(17) . . ?
C2 W1 C5 98.53(17) . . ?
C4 W1 C3 70.55(14) . . ?
C7 W1 C3 74.84(15) . . ?
C2 W1 C3 76.16(14) . . ?
C5 W1 C3 143.44(14) . . ?
C4 W1 C6 142.56(15) . . ?
C7 W1 C6 76.87(16) . . ?
C2 W1 C6 76.60(16) . . ?
C5 W1 C6 71.27(15) . . ?
C3 W1 C6 72.34(13) . . ?
C4 W1 C8 76.89(18) . . ?
C7 W1 C8 71.16(15) . . ?
C2 W1 C8 143.25(14) . . ?
C5 W1 C8 76.79(18) . . ?
C3 W1 C8 128.36(14) . . ?
C6 W1 C8 132.63(17) . . ?
C4 W1 C1 77.24(14) . . ?
C7 W1 C1 142.77(14) . . ?
C2 W1 C1 71.87(13) . . ?
C5 W1 C1 74.36(14) . . ?
C3 W1 C1 134.06(13) . . ?
C6 W1 C1 128.48(14) . . ?
C8 W1 C1 71.80(13) . . ?
O11 Ce2 O41 139.51(11) . . ?
O11 Ce2 O21 73.19(12) . . ?
O41 Ce2 O21 139.36(10) . . ?
O11 Ce2 O31 116.26(13) . . ?
O41 Ce2 O31 72.71(10) . . ?
O21 Ce2 O31 69.56(11) . . ?
O11 Ce2 O6 74.97(12) . . ?
O41 Ce2 O6 72.96(10) . . ?
O21 Ce2 O6 147.03(10) . . ?
O31 Ce2 O6 134.37(10) . . ?
O11 Ce2 N1 141.91(11) . . ?
O41 Ce2 N1 78.41(10) . . ?
O21 Ce2 N1 75.81(11) . . ?
O31 Ce2 N1 71.42(10) . . ?
O6 Ce2 N1 128.43(10) . . ?
O11 Ce2 N3 72.01(12) . 2 ?
O41 Ce2 N3 76.35(10) . 2 ?
O21 Ce2 N3 102.63(12) . 2 ?
O31 Ce2 N3 68.27(10) . 2 ?
O6 Ce2 N3 75.12(10) . 2 ?
N1 Ce2 N3 137.14(10) . 2 ?
O11 Ce2 N56 69.93(11) . . ?
O41 Ce2 N56 133.73(8) . . ?
O21 Ce2 N56 70.64(10) . . ?
O31 Ce2 N56 135.02(10) . . ?
O6 Ce2 N56 90.59(9) . . ?
N1 Ce2 N56 79.32(10) . . ?
N3 Ce2 N56 141.65(9) 2 . ?
O11 Ce2 N52 112.70(12) . 3_656 ?
O41 Ce2 N52 76.22(8) . 3_656 ?
O21 Ce2 N52 118.63(10) . 3_656 ?
O31 Ce2 N52 130.24(10) . 3_656 ?
O6 Ce2 N52 67.12(9) . 3_656 ?
N1 Ce2 N52 64.89(9) . 3_656 ?
N3 Ce2 N52 138.28(10) 2 3_656 ?
N56 Ce2 N52 57.62(7) . 3_656 ?
C1 N1 Ce2 174.8(3) . . ?
N1 C1 W1 178.4(3) . . ?
N2 C2 W1 178.5(4) . . ?
N3 C3 W1 178.7(3) . . ?
C3 N3 Ce2 170.5(3) . 2_545 ?
N4 C4 W1 179.0(4) . . ?
N5 C5 W1 178.6(4) . . ?
N6 C6 W1 178.7(4) . . ?
N7 C7 W1 176.6(4) . . ?
N8 C8 W1 179.2(4) . . ?
C12 O11 Ce2 162.1(3) . . ?
O11 C12 N13 125.6(5) . . ?
O11 C12 H12 117.2 . . ?
N13 C12 H12 117.2 . . ?
C12 N13 C14 119.6(5) . . ?
C12 N13 C15 124.6(5) . . ?
C14 N13 C15 115.7(5) . . ?
N13 C14 H14A 109.5 . . ?
N13 C14 H14B 109.5 . . ?
H14A C14 H14B 109.5 . . ?
N13 C14 H14C 109.5 . . ?
H14A C14 H14C 109.5 . . ?
H14B C14 H14C 109.5 . . ?
N13 C15 H15A 109.5 . . ?
N13 C15 H15B 109.5 . . ?
H15A C15 H15B 109.5 . . ?
N13 C15 H15C 109.5 . . ?
H15A C15 H15C 109.5 . . ?
H15B C15 H15C 109.5 . . ?
C22 O21 Ce2 135.8(3) . . ?
O21 C22 N23 125.0(5) . . ?
O21 C22 H22 117.5 . . ?
N23 C22 H22 117.5 . . ?
C22 N23 C25 120.4(5) . . ?
C22 N23 C24 121.0(5) . . ?
C25 N23 C24 118.6(5) . . ?
N23 C24 H24A 109.5 . . ?
N23 C24 H24B 109.5 . . ?
H24A C24 H24B 109.5 . . ?
N23 C24 H24C 109.5 . . ?
H24A C24 H24C 109.5 . . ?
H24B C24 H24C 109.5 . . ?
N23 C25 H25A 109.5 . . ?
N23 C25 H25B 109.5 . . ?
H25A C25 H25B 109.5 . . ?
N23 C25 H25C 109.5 . . ?
H25A C25 H25C 109.5 . . ?
H25B C25 H25C 109.5 . . ?
C32 O31 Ce2 137.8(3) . . ?
O31 C32 N33 124.8(5) . . ?
O31 C32 H32 117.6 . . ?
N33 C32 H32 117.6 . . ?
C32 N33 C34 122.6(6) . . ?
C32 N33 C35 120.2(6) . . ?
C34 N33 C35 117.2(6) . . ?
N33 C34 H34A 109.5 . . ?
N33 C34 H34B 109.5 . . ?
H34A C34 H34B 109.5 . . ?
N33 C34 H34C 109.5 . . ?
H34A C34 H34C 109.5 . . ?
H34B C34 H34C 109.5 . . ?
N33 C35 H35A 109.5 . . ?
N33 C35 H35B 109.5 . . ?
H35A C35 H35B 109.5 . . ?
N33 C35 H35C 109.5 . . ?
H35A C35 H35C 109.5 . . ?
H35B C35 H35C 109.5 . . ?
C42 O41 Ce2 131.7(3) . . ?
O41 C42 N43 124.8(4) . . ?
O41 C42 H42 117.6 . . ?
N43 C42 H42 117.6 . . ?
C42 N43 C44 120.1(4) . . ?
C42 N43 C45 120.8(5) . . ?
C44 N43 C45 119.1(5) . . ?
N43 C44 H44A 109.5 . . ?
N43 C44 H44B 109.5 . . ?
H44A C44 H44B 109.5 . . ?
N43 C44 H44C 109.5 . . ?
H44A C44 H44C 109.5 . . ?
H44B C44 H44C 109.5 . . ?
N43 C45 H45A 109.5 . . ?
N43 C45 H45B 109.5 . . ?
H45A C45 H45B 109.5 . . ?
N43 C45 H45C 109.5 . . ?
H45A C45 H45C 109.5 . . ?
H45B C45 H45C 109.5 . . ?
N52 C51 N56 126.6(3) . . ?
N52 C51 C51 116.5(3) . 3_656 ?
N56 C51 C51 116.8(3) . 3_656 ?
C51 N52 C53 116.2(3) . . ?
C51 N52 Ce2 124.30(19) . 3_656 ?
C53 N52 Ce2 119.3(2) . 3_656 ?
N52 C53 C54 121.2(3) . . ?
N52 C53 H53 119.4 . . ?
C54 C53 H53 119.4 . . ?
C55 C54 C53 118.2(3) . . ?
C55 C54 H54 120.9 . . ?
C53 C54 H54 120.9 . . ?
N56 C55 C54 121.7(3) . . ?
N56 C55 H55 119.1 . . ?
C54 C55 H55 119.1 . . ?
C51 N56 C55 116.0(3) . . ?
C51 N56 Ce2 124.5(2) . . ?
C55 N56 Ce2 119.4(2) . . ?
 
loop_
    _geom_torsion_atom_site_label_1
    _geom_torsion_atom_site_label_2
    _geom_torsion_atom_site_label_3
    _geom_torsion_atom_site_label_4
    _geom_torsion
    _geom_torsion_site_symmetry_1
    _geom_torsion_site_symmetry_2
    _geom_torsion_site_symmetry_3
    _geom_torsion_site_symmetry_4
    _geom_torsion_publ_flag
O41 Ce2 O11 C12 15.7(14) . . . . ?
O21 Ce2 O11 C12 165.8(13) . . . . ?
O31 Ce2 O11 C12 109.5(13) . . . . ?
O6 Ce2 O11 C12 -22.9(13) . . . . ?
N1 Ce2 O11 C12 -157.4(12) . . . . ?
N3 Ce2 O11 C12 56.0(13) 2 . . . ?
N56 Ce2 O11 C12 -119.2(13) . . . . ?
N52 Ce2 O11 C12 -79.6(13) 3_656 . . . ?
Ce2 O11 C12 N13 -121.0(11) . . . . ?
O11 C12 N13 C14 2.1(9) . . . . ?
O11 C12 N13 C15 177.7(6) . . . . ?
O11 Ce2 O21 C22 -168.6(5) . . . . ?
O41 Ce2 O21 C22 -18.4(5) . . . . ?
O31 Ce2 O21 C22 -41.3(4) . . . . ?
O6 Ce2 O21 C22 175.9(4) . . . . ?
N1 Ce2 O21 C22 33.9(4) . . . . ?
N3 Ce2 O21 C22 -102.0(4) 2 . . . ?
N56 Ce2 O21 C22 117.3(5) . . . . ?
N52 Ce2 O21 C22 84.3(5) 3_656 . . . ?
Ce2 O21 C22 N23 142.3(4) . . . . ?
O21 C22 N23 C25 -1.2(8) . . . . ?
O21 C22 N23 C24 177.1(6) . . . . ?
O11 Ce2 O31 C32 -0.7(5) . . . . ?
O41 Ce2 O31 C32 136.6(5) . . . . ?
O21 Ce2 O31 C32 -58.8(4) . . . . ?
O6 Ce2 O31 C32 93.8(5) . . . . ?
N1 Ce2 O31 C32 -140.1(5) . . . . ?
N3 Ce2 O31 C32 54.8(4) 2 . . . ?
N56 Ce2 O31 C32 -87.9(4) . . . . ?
N52 Ce2 O31 C32 -169.6(4) 3_656 . . . ?
Ce2 O31 C32 N33 154.5(4) . . . . ?
O31 C32 N33 C34 0.2(11) . . . . ?
O31 C32 N33 C35 177.4(6) . . . . ?
O11 Ce2 O41 C42 79.5(4) . . . . ?
O21 Ce2 O41 C42 -53.3(4) . . . . ?
O31 Ce2 O41 C42 -30.9(4) . . . . ?
O6 Ce2 O41 C42 118.6(4) . . . . ?
N1 Ce2 O41 C42 -104.8(4) . . . . ?
N3 Ce2 O41 C42 40.2(4) 2 . . . ?
N56 Ce2 O41 C42 -167.6(4) . . . . ?
N52 Ce2 O41 C42 -171.5(4) 3_656 . . . ?
Ce2 O41 C42 N43 156.0(4) . . . . ?
O41 C42 N43 C44 0.7(9) . . . . ?
O41 C42 N43 C45 178.2(6) . . . . ?
N56 C51 N52 C53 1.7(5) . . . . ?
C51 C51 N52 C53 -179.3(4) 3_656 . . . ?
N56 C51 N52 Ce2 176.8(2) . . . 3_656 ?
C51 C51 N52 Ce2 -4.1(5) 3_656 . . 3_656 ?
C51 N52 C53 C54 0.1(6) . . . . ?
Ce2 N52 C53 C54 -175.3(4) 3_656 . . . ?
N52 C53 C54 C55 -1.0(8) . . . . ?
C53 C54 C55 N56 0.3(8) . . . . ?
N52 C51 N56 C55 -2.4(5) . . . . ?
C51 C51 N56 C55 178.6(4) 3_656 . . . ?
N52 C51 N56 Ce2 176.2(2) . . . . ?
C51 C51 N56 Ce2 -2.8(5) 3_656 . . . ?
C54 C55 N56 C51 1.3(6) . . . . ?
C54 C55 N56 Ce2 -177.4(4) . . . . ?
O11 Ce2 N56 C51 139.2(3) . . . . ?
O41 Ce2 N56 C51 -1.3(3) . . . . ?
O21 Ce2 N56 C51 -142.2(3) . . . . ?
O31 Ce2 N56 C51 -113.3(3) . . . . ?
O6 Ce2 N56 C51 65.4(3) . . . . ?
N1 Ce2 N56 C51 -63.7(3) . . . . ?
N3 Ce2 N56 C51 131.8(3) 2 . . . ?
N52 Ce2 N56 C51 3.3(2) 3_656 . . . ?
O11 Ce2 N56 C55 -42.2(3) . . . . ?
O41 Ce2 N56 C55 177.3(3) . . . . ?
O21 Ce2 N56 C55 36.3(3) . . . . ?
O31 Ce2 N56 C55 65.3(3) . . . . ?
O6 Ce2 N56 C55 -116.0(3) . . . . ?
N1 Ce2 N56 C55 114.9(3) . . . . ?
N3 Ce2 N56 C55 -49.6(4) 2 . . . ?
N52 Ce2 N56 C55 -178.1(3) 3_656 . . . ?
 
